# Supplementary material for: Estrogen receptor beta signaling in CD8+ T cells boosts T cell receptor activation and antitumor immunity through a phosphotyrosine switch
Source: PubMed Central journal article supplement (PMC7816924; doi:10.1136/jitc-2020-001932), 2021-01-18

Supplementary Figure S3. immunophenotyping analysis of tumor from WT and KI mice

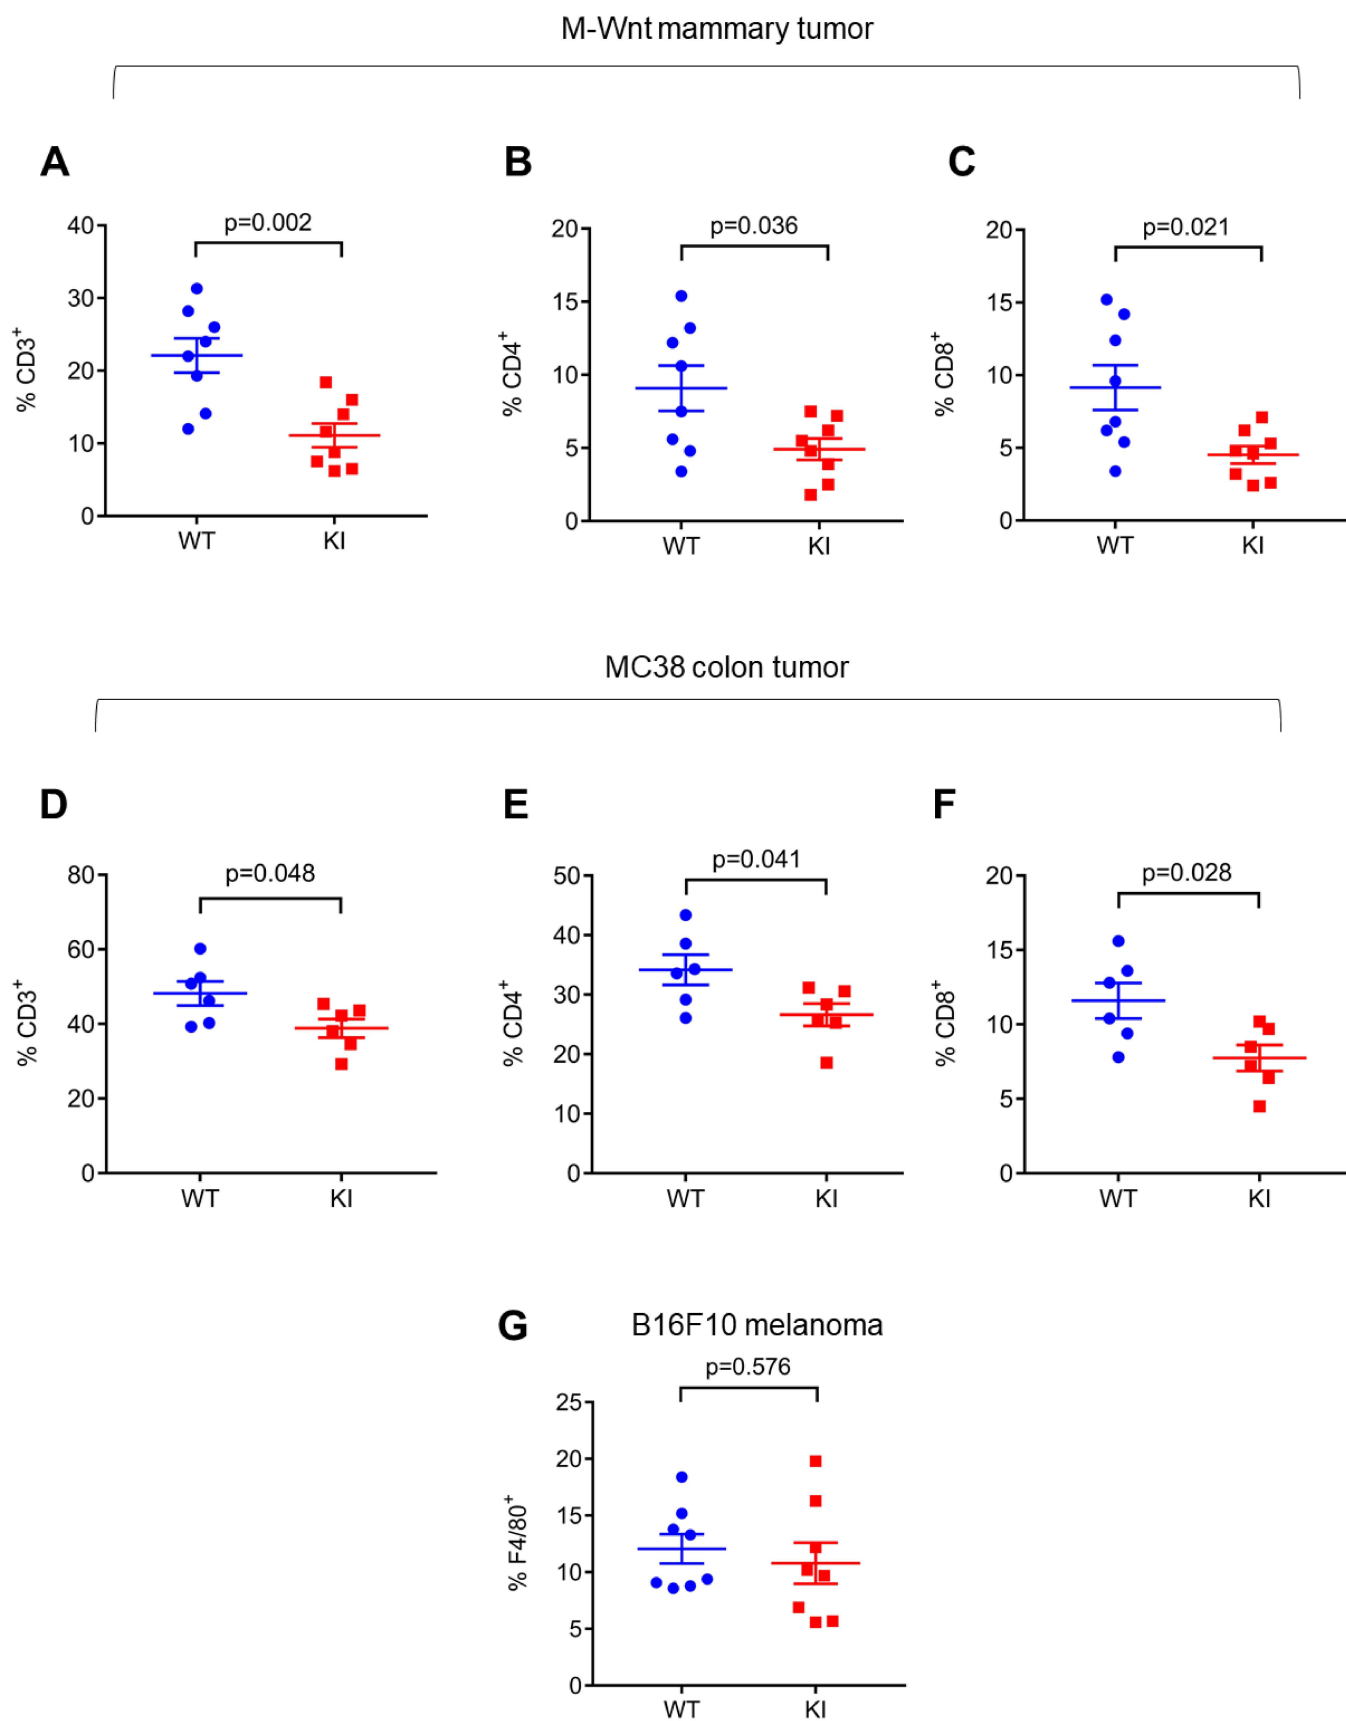

Supplement: jitc-2020-001932supp003.pdf [file jitc-2020-001932supp003.pdf]
