# Supplementary material for: Estrogen receptor beta signaling in CD8+ T cells boosts T cell receptor activation and antitumor immunity through a phosphotyrosine switch
Source: PubMed Central journal article supplement (PMC7816924; doi:10.1136/jitc-2020-001932), 2021-01-18

Supplementary Figure S7. ER $\beta$ -selective agonist S-equol boosts anti-PD-1 immunotherapy**A**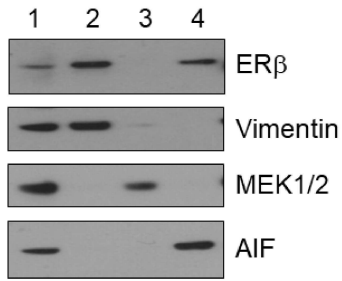

1. whole cell lysate;
2. nuclear and cytoskeleton;
3. cytoplasmic;
4. membrane associated.

**B**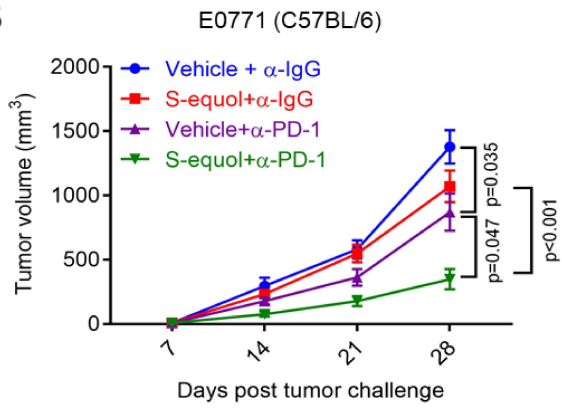**C**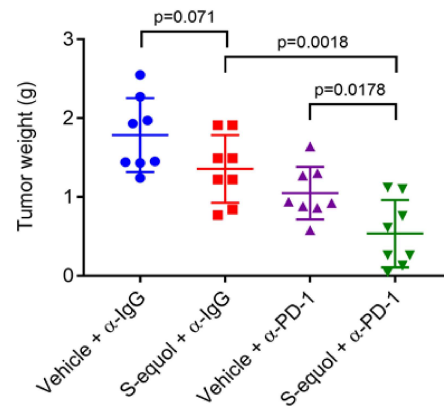**D**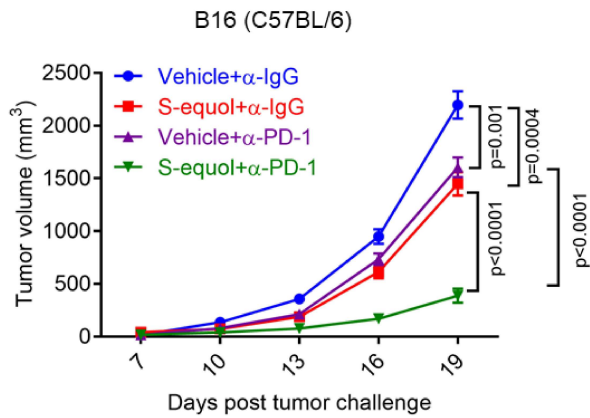**E**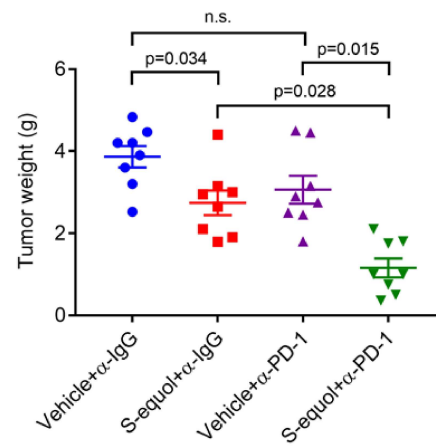

Supplement: jitc-2020-001932supp008.pdf [file jitc-2020-001932supp008.pdf]
